# Supplementary material
Source: Springer Nature journal article supplement (https://www.springermedizin.de/resource/supplementary/12936_2008_604_MOESM4_ESM.pdf/9547804)

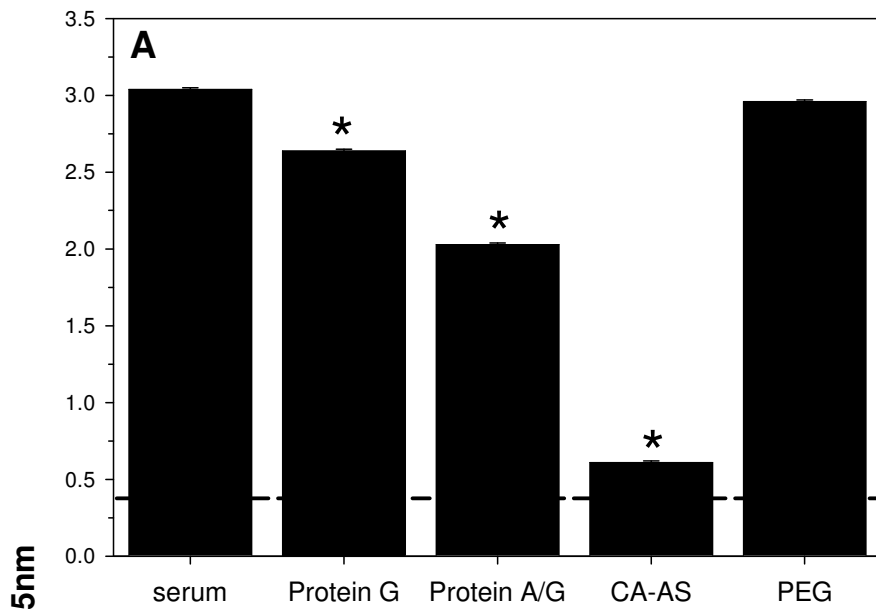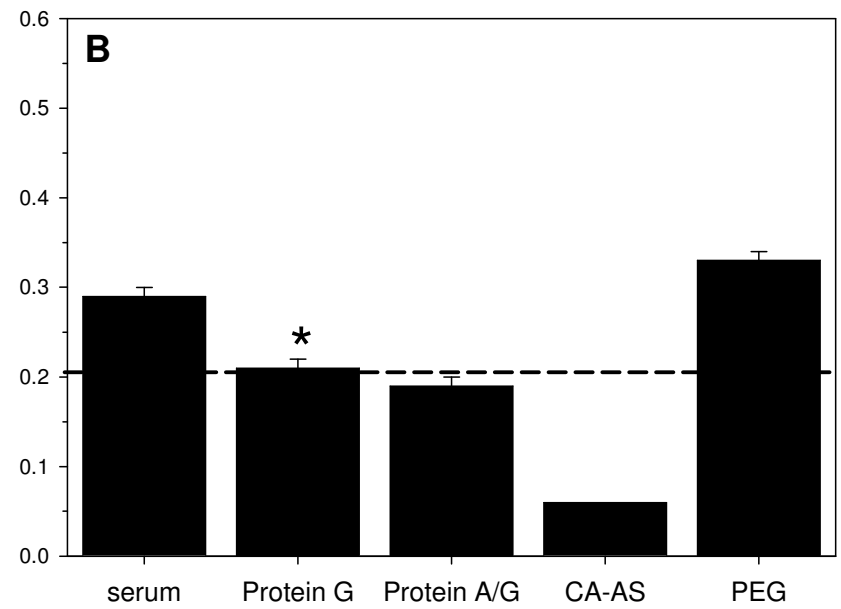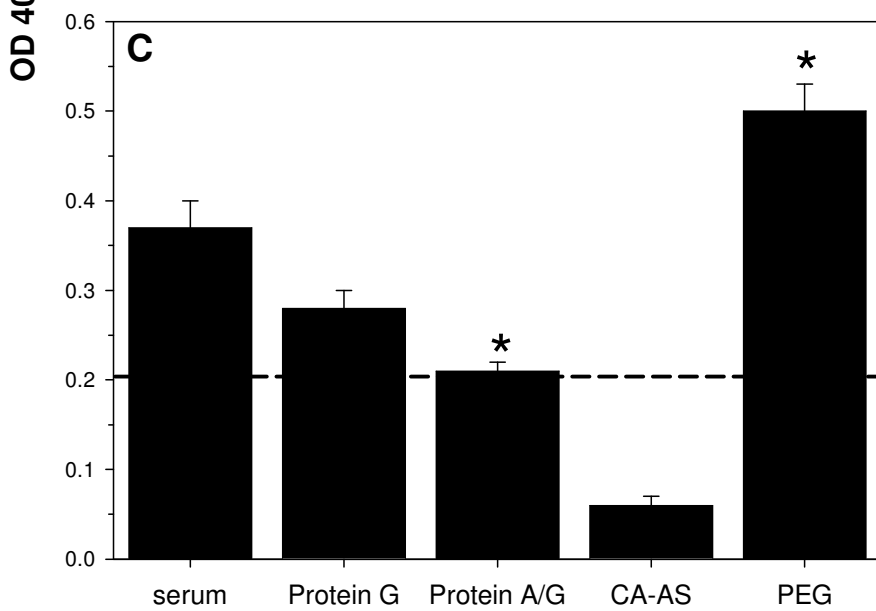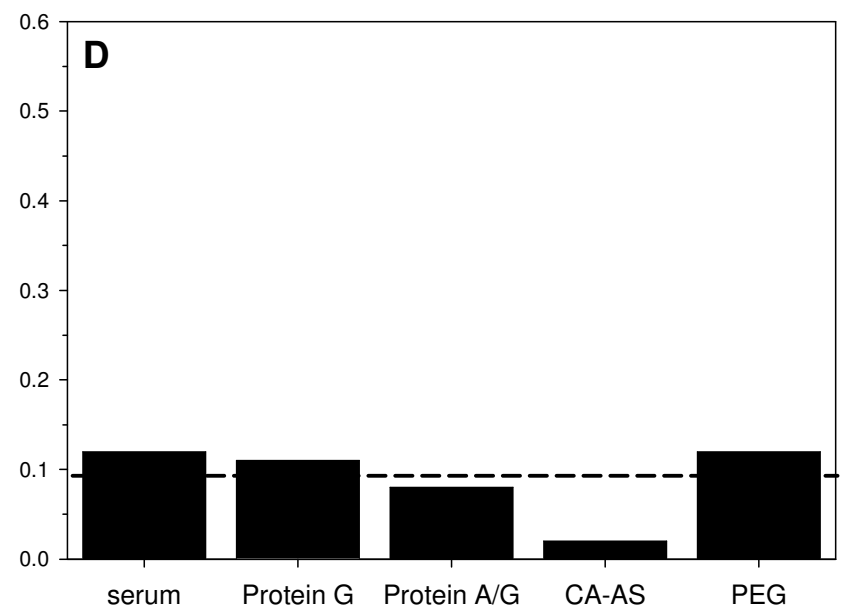

**Treatment Groups**

Supplement: MOESM4 [file 9547804]
